# Supplementary material for: Modulation of Synthetic Tracheal Grafts with Extracellular Matrix Coatings
Source: MDPI journal article supplement (doi:10.3390/bioengineering8080116), 2021-08-20
Supplement: s1 [file s1]

*Supplementary data of:*

# **Modulation of Synthetic Tracheal Grafts with Extracellular Matrix Coatings**

**Lumei Liu <sup>1,2</sup>, Sayali Dharmadhikari <sup>1,2</sup>, Robert A. Pouliot <sup>3</sup>, Michael M. Li <sup>2</sup>, Peter M. Minneci <sup>1</sup>, Zhenghong Tan <sup>4</sup>, Kimberly Shontz <sup>1</sup>, Jed Johnson <sup>5</sup>, Susan D. Reynolds <sup>6</sup>, Christopher K. Breuer <sup>1,7</sup>, Daniel J. Weiss <sup>2</sup> and Tendy Chiang <sup>1,2,\*</sup>**

<sup>1</sup> Center of Regenerative Medicine, Abigail Wexner Research Institute, Nationwide Children's Hospital, Columbus, OH 43215, USA; lumei.liu@nationwidechildrens.org (L.L.);

Sayali.Dharmadhikari@nationwidechildrens.org (S.D.); pmminneci@gmail.com (P.M.M.);

Kim.Shontz@nationwidechildrens.org (K.S.); christopher.breuer@nationwidechildrens.org (C.K.B.)

<sup>2</sup> Department of Pediatric Otolaryngology, Nationwide Children's Hospital, Columbus, OH 43205, USA; Michael.Li@osumc.edu

<sup>3</sup> Department of Medicine, Larner College of Medicine, University of Vermont, Burlington, VT 05405, USA; Robert.Pouliot@uvm.edu (R.A.P.); daniel.weiss@med.uvm.edu (D.J.W.)

<sup>4</sup> College of Medicine, The Ohio State University, Columbus, OH 43210, USA; ZhengHong.Tan@osumc.edu

<sup>5</sup> Nanofiber Solutions, Inc, Columbus, OH 43017, USA; jed.johnson@nanofibersolutions.com

<sup>6</sup> Center for Perinatal Research, Abigail Wexner Research Institute, Nationwide Children's Hospital, Columbus, OH 43215, USA; Susan.Reynolds@nationwidechildrens.org

<sup>7</sup> Department of Pediatric Surgery, Nationwide Children's Hospital, Columbus, OH 43205, USA

<sup>7</sup>

\* Correspondence: Tendy.Chiang@nationwidechildrens.org; Tel.: +1-(614)-722-6600, Fax: +1-(614)-722-6609

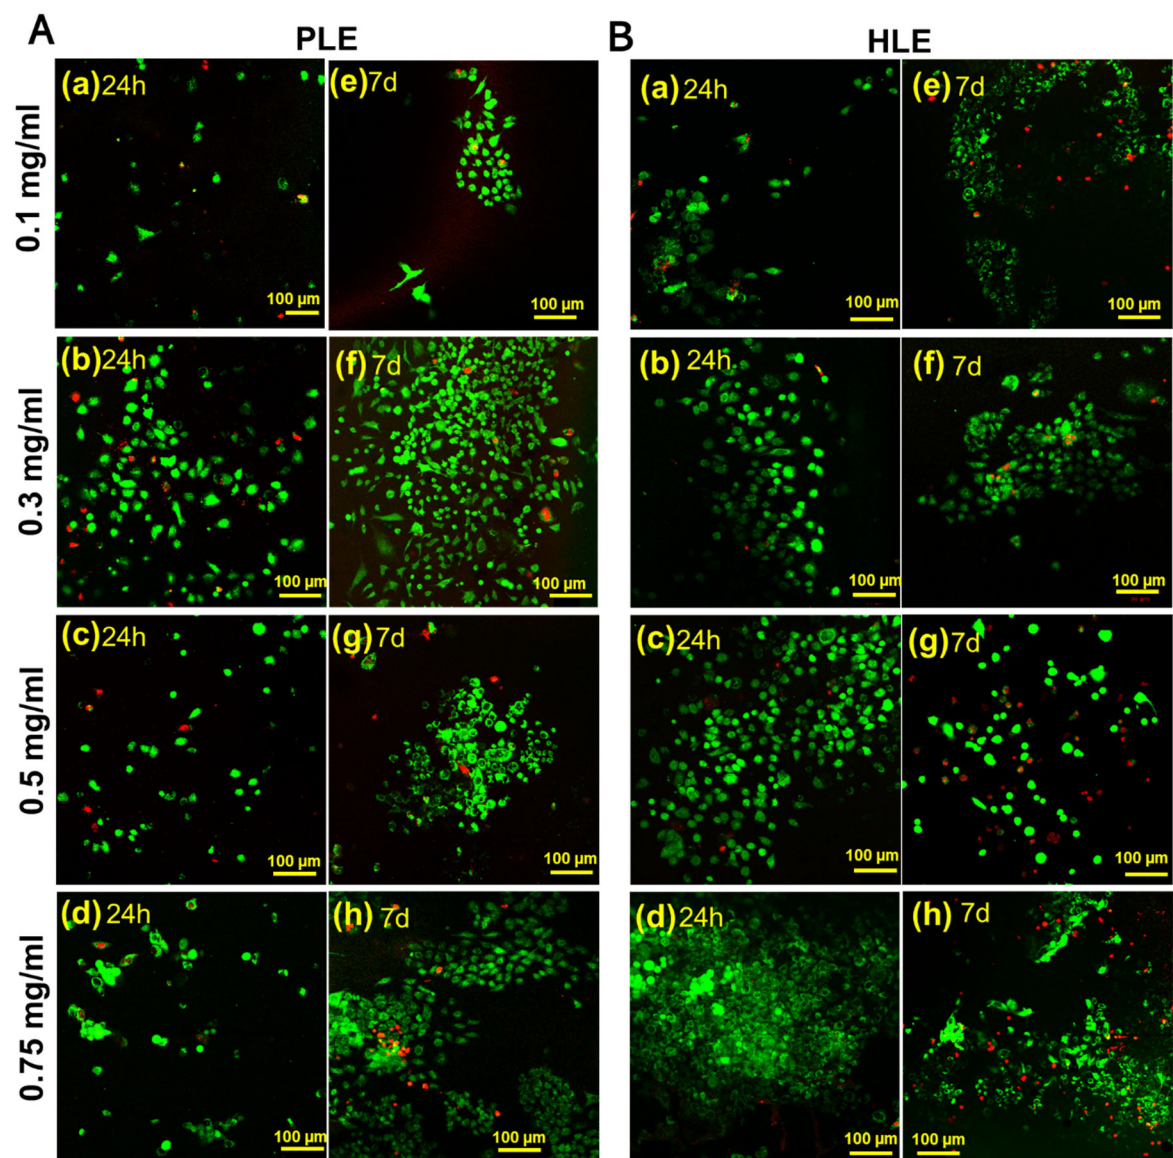

**Figure S1.** Representative live/dead images of (A) cells on PLE-coated scaffolds for 24h ((a)~(d)) and 7d ((e)~(f)), and (B) cells on HLE-coated scaffolds for 24h ((a)~(d)) and 7d ((e)~(f)). Live cells are stained in green and red cells are stained in red.
